# Supplementary material for: Multifunctional anionic nanoemulsion with linseed oil and lecithin: a preliminary approach for dry eye disease
Source: publisher site journal article supplement (doi:10.3762/bjnano.16.120), 2025-10-02
Supplement: Additional file 1 [file 2190-4286-16-120-S1.pdf]

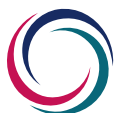

## Supporting Information

for

### **Multifunctional anionic nanoemulsion with linseed oil and lecithin: a preliminary approach for dry eye disease**

Niédja Fittipaldi Vasconcelos, Almerinda Agrelli, Rayane Cristine Santos da Silva, Carina Lucena Mendes-Marques, Isabel Renata de Souza Arruda, Priscilla Stela Santana de Oliveira, Mércia Liane de Oliveira and Giovanna Machado

*Beilstein J. Nanotechnol.* **2025**, *16*, 1711–1733. doi:10.3762/bjnano.16.120

## Supplementary tables and figures

## SUPPLEMENTARY TABLES AND FIGURES

**Table S1:** A detailed description of the mass composition of the pre-formulation emulsions (8% w/w LO in water).

| Pre-Formulation<br>Emulsions Code* | Composition (in grams) |               |              | [Total]<br>(%, w/w)*** |
|------------------------------------|------------------------|---------------|--------------|------------------------|
|                                    | Milli-Q water          | Linseed Oil** | Egg lecithin |                        |
| O/W(L-1%)                          | 25                     | 2             | 0.25         | 8.2                    |
| O/W(L-2%)                          | 25                     | 2             | 0.5          | 9.1                    |
| O/W(L-3%)                          | 25                     | 2             | 0.75         | 9.9                    |
| O/W(L-4%)                          | 25                     | 2             | 1.0          | 10.7                   |
| O/W(L-5%)                          | 25                     | 2             | 1.25         | 11.5                   |

\* Lecithin is represented by the letter L

\*\* Density of oil at 75 °C = 0.89 g.cm<sup>-1</sup>

\*\*\* [Total] = [(Mass of Linseed Oil + Mass of Egg lecithin) / Mass of Water + Mass of Linseed Oil + Mass of Egg lecithin] x 100

**Table S2:** Mass composition of the ophthalmic nanoformulations prepared with 2.6% (w/v) linseed oil (equivalent to 26 mg·mL<sup>-1</sup> or 26,000 µg·mL<sup>-1</sup>) in the ophthalmic vehicle.

| Ophthalmic<br>Nanoformulations | Composition                  |                           |                         |                |                 | Total<br>mass<br>(g) | [Total]<br>(%, w/w)*** |
|--------------------------------|------------------------------|---------------------------|-------------------------|----------------|-----------------|----------------------|------------------------|
|                                | Ophthalmic<br>Vehicle<br>(g) | Kolliphor®<br>HS15<br>(g) | Milli-Q<br>water<br>(g) | O/W(L-3%)**    |                 |                      |                        |
|                                |                              |                           |                         | (g)            |                 |                      |                        |
|                                |                              |                           |                         | Linseed<br>Oil | Egg<br>lecithin |                      |                        |
|                                |                              |                           |                         |                |                 |                      |                        |
| OphtNE-3.70%                   | 6.25                         | -                         | 3.38                    | 0.26           | 0.11            | 10.0                 | 3.70                   |
| OphtNE-3.66%(K1%)*             | 6.25                         | 0.1                       | 3.38                    | 0.26           | 0.11            | 10.1                 | 3.66                   |

\* Kolliphor® HS15, indicated by K

\*\* Density of the mixture = 0.995 g.cm<sup>-1</sup>

\*\*\* [Total] = [(Mass of Linseed Oil + Mass of Egg lecithin) / Mass of Water + Mass of Linseed Oil + Mass of Egg lecithin + Mass of Ophthalmic Vehicle] x 100

**Figure S1:** Droplet diameter distribution graph for pre-formulation emulsions: (A) O/W(L-1%), (B) O/W(L-2%), (C) O/W(L-3%), (D) O/W(L-4%), and (E) O/W(L-5%).

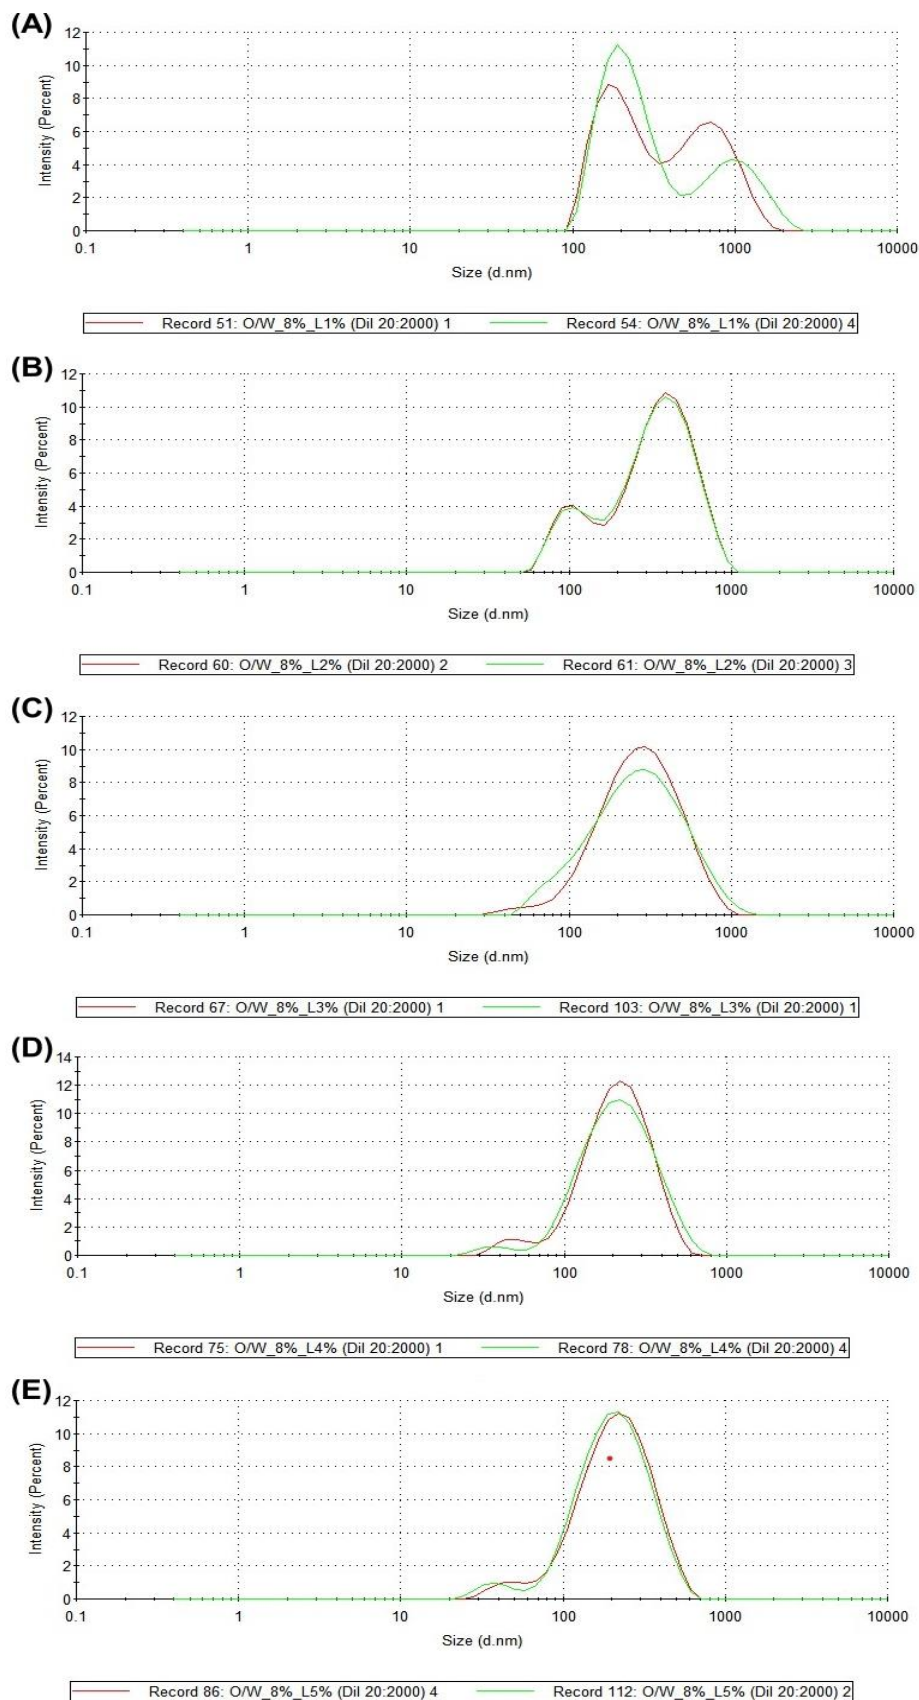

**Figure S2:** The macroscopic appearance of pre-formulation emulsions after 24 h reveals a homogeneous, milky-white appearance.

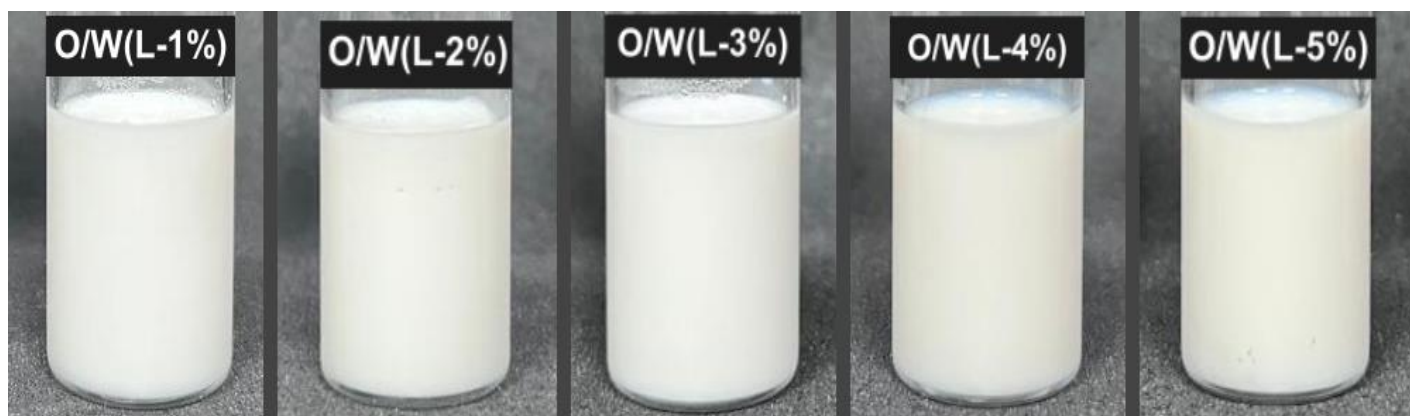

- **O/W(L-1%)** - Pre-emulsion (8.2% w/w) containing 1% (w/w) lecithin (composition: 0.25 g lecithin : 2 g linseed oil : 25 g de Milli-Q water);
- **O/W(L-2%)** - Pre-emulsion (9.1% w/w) containing 2% (w/w) lecithin (composition: 0.5 g lecithin : 2 g linseed oil : 25 g de Milli-Q water);
- **O/W(L-3%)** - Pre-emulsion (9.9% w/w) containing 3% (w/w) lecithin (composition: 0.75 g lecithin : 2 g linseed oil : 25 g de Milli-Q water);
- **O/W(L-4%)** - Pre-emulsion (10.7% w/w) containing 4% (w/w) lecithin (composition: 1.0 g lecithin : 2 g linseed oil : 25 g de Milli-Q water);
- **O/W(L-5%)** - Pre-emulsion (11.5% w/w) containing 5% (w/w) lecithin (composition: 1.25 g lecithin : 2 g linseed oil : 25 g de Milli-Q water).

**Figure S3:** Linear regression analysis was used to determine the IC<sub>50</sub> values for the antioxidant activity of ophthalmic nanoformulations, based on DPPH radical scavenging: (a) OphtNE-3.70% and (b) OphtNE-3.66%(K1%).

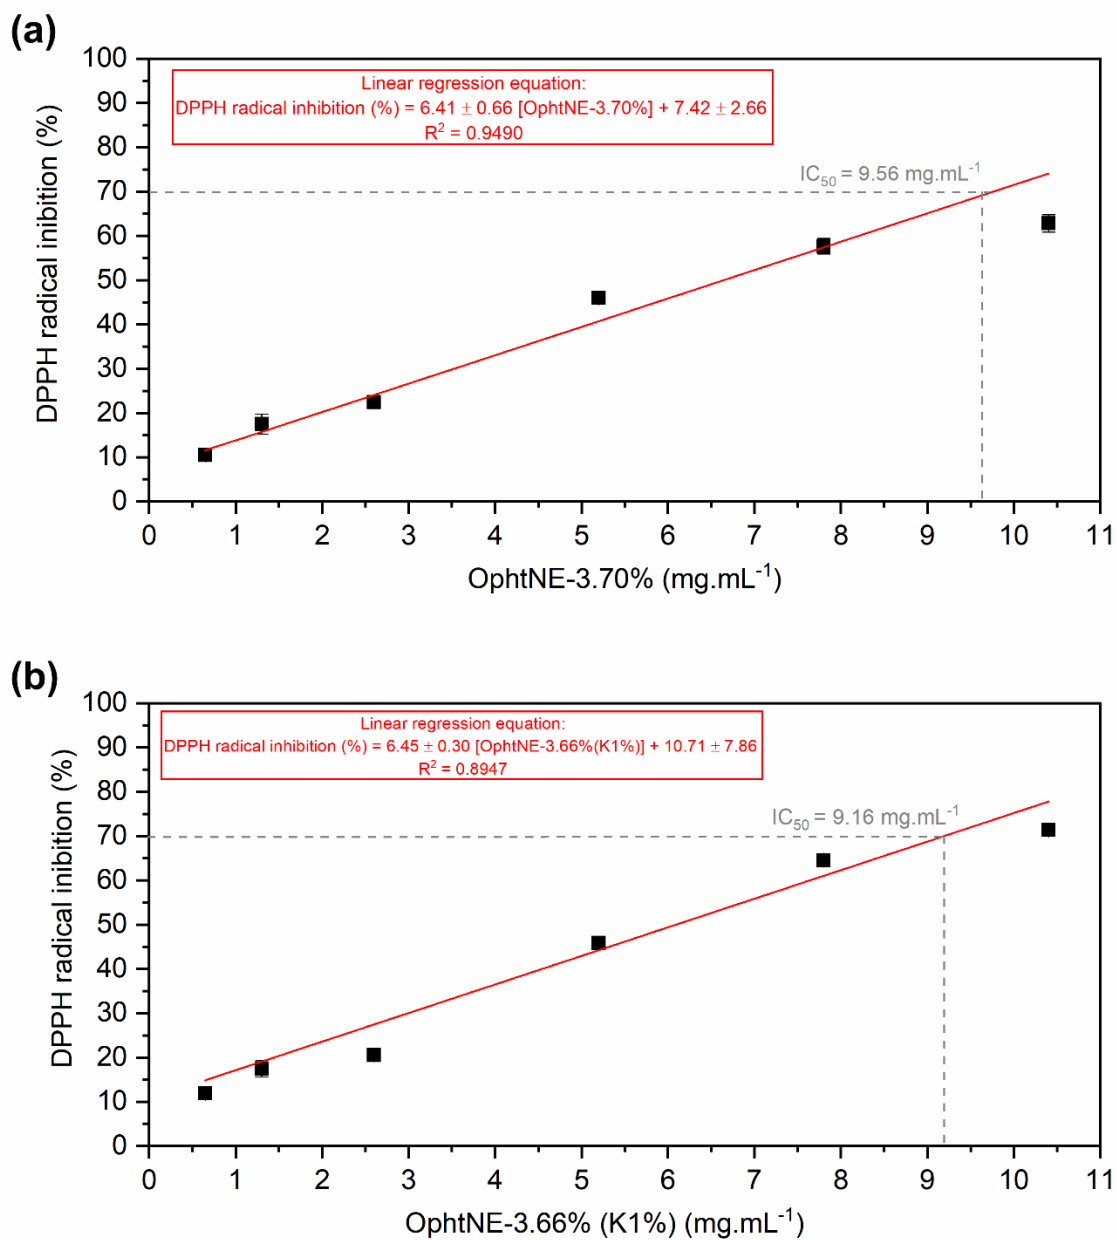

## SUPPLEMENTARY ANOVA RESULTS

**Table S3:** Two-way ANOVA evaluating the effects of treatment, concentration, and their interaction on MTT assay absorbance in L929 cells at 24 and 72 h. This analysis was conducted to further investigate the statistically significant interaction between treatment and concentration identified in the three-way ANOVA (Table 4 of the paper). Reported values include degrees of freedom (DF), F-statistics, *p*-values, generalized eta-squared (GE), and adjusted *p*-values. Significant effects are indicated for *p* < 0.05.

| Time (h) | Effect                               | DF <sub>n</sub> | DF <sub>d</sub> | F      | <i>p</i>               | ges   | <i>p</i> _adjust       | <i>p</i> < 0.05 |
|----------|--------------------------------------|-----------------|-----------------|--------|------------------------|-------|------------------------|-----------------|
| 24       | Treatment                            | 1               | 99              | 57.985 | 1.59 10 <sup>-11</sup> | 0.369 | 3.18 10 <sup>-11</sup> | *               |
| 24       | Concentration (mg·mL <sup>-1</sup> ) | 8               | 99              | 22.881 | 2.00 10 <sup>-19</sup> | 0.649 | 4.00 10 <sup>-19</sup> | *               |
| 24       | Treatment:Concentration              | 8               | 99              | 5.244  | 1.76 10 <sup>-5</sup>  | 0.298 | 3.52 10 <sup>-5</sup>  | *               |
| 72       | Treatment                            | 1               | 99              | 27.365 | 9.42 10 <sup>-7</sup>  | 0.217 | 1.88 10 <sup>-3</sup>  | *               |
| 72       | Concentration (mg·mL <sup>-1</sup> ) | 8               | 99              | 39.913 | 1.08 10 <sup>-27</sup> | 0.763 | 2.16 10 <sup>-27</sup> | *               |
| 72       | Treatment:Concentration              | 8               | 99              | 4.287  | 0.000186               | 0.257 | 0.000372               | *               |

\* significant (*p* < 0.05)

**Table S4:** One-way ANOVA assessing the effect of concentration at each exposure time (24 and 72 h) by pooling treatment groups, based on the significant Treatment:Concentration interaction observed in the two-way ANOVA (Table S3). Values reported include degrees of freedom (DF), F-statistics, *p*-values, generalized eta-squared (ges), and adjusted *p*-values. Significant effects are indicated for *p* < 0.05.

| Concentration (mg·mL <sup>-1</sup> ) | Time (h) | DF <sub>n</sub> | DF <sub>d</sub> | F      | <i>p</i>              | ges      | <i>p</i> _adjust      | <i>p</i> < 0.05 |
|--------------------------------------|----------|-----------------|-----------------|--------|-----------------------|----------|-----------------------|-----------------|
| Negative Control                     | 24       | 1               | 99              | 0      | 1                     | 0        | 1                     | ns              |
| Positive Control                     | 24       | 1               | 99              | 0      | 1                     | 0        | 1                     | ns              |
| 0.65                                 | 24       | 1               | 99              | 1.611  | 0.207                 | 0.016    | 0.414                 | ns              |
| 1.30                                 | 24       | 1               | 99              | 2.359  | 0.128                 | 0.023    | 0.256                 | ns              |
| 2.60                                 | 24       | 1               | 99              | 8.917  | 0.004                 | 0.083    | 0.008                 | *               |
| 5.20                                 | 24       | 1               | 99              | 30.559 | 2.63 10 <sup>-7</sup> | 0.236    | 5.26 10 <sup>-7</sup> | *               |
| 7.80                                 | 24       | 1               | 99              | 43.988 | 1.76 10 <sup>-9</sup> | 0.308    | 3.52 10 <sup>-9</sup> | *               |
| 10.4                                 | 24       | 1               | 99              | 10.622 | 0.002                 | 0.097    | 0.004                 | *               |
| 13.0                                 | 24       | 1               | 99              | 1.879  | 0.174                 | 0.019    | 0.348                 | ns              |
| Negative Control                     | 72       | 1               | 99              | 0      | 1                     | 0        | 1                     | ns              |
| Positive Control                     | 72       | 1               | 99              | 0      | 1                     | 0        | 1                     | ns              |
| 0.65                                 | 72       | 1               | 99              | 0.136  | 0.714                 | 0.001    | 1                     | ns              |
| 1.30                                 | 72       | 1               | 99              | 5.225  | 0.024                 | 0.05     | 0.048                 | *               |
| 2.60                                 | 72       | 1               | 99              | 11.551 | 0.000977              | 0.104    | 0.001954              | *               |
| 5.20                                 | 72       | 1               | 99              | 27.421 | 9.21 10 <sup>-7</sup> | 0.217    | 1.84·10 <sup>-3</sup> | *               |
| 7.80                                 | 72       | 1               | 99              | 17.234 | 7.01 10 <sup>-5</sup> | 0.148    | 0.0001402             | *               |
| 10.4                                 | 72       | 1               | 99              | 0.035  | 0.852                 | 0.000353 | 1                     | ns              |
| 13.0                                 | 72       | 1               | 99              | 0.059  | 0.809                 | 0.000591 | 1                     | ns              |

\* significant (*p* < 0.05); ns: not significant

**Table S5:** Two-way ANOVA evaluating the effects of concentration, time, and their interaction on MTT assay absorbance in L929 cells for each treatment group (OphtNE-3.70% and OphtNE-3.66%(K1%)). This analysis was conducted to further investigate the statistically significant Concentration:Time interaction identified in the three-way ANOVA (Table 4 of the paper). Reported values include degrees of freedom (DF), F-statistics, *p*-values, generalized eta-squared (ges), and adjusted *p*-values. Significant effects are indicated for *p* < 0.05.

| Treatment         | Effect                               | DF <sub>n</sub> | DF <sub>d</sub> | <i>F</i> | <i>p</i>               | ges   | <i>p</i> _adjust       | <i>p</i> < 0.05 |
|-------------------|--------------------------------------|-----------------|-----------------|----------|------------------------|-------|------------------------|-----------------|
| OphtNE-3.70%      | Concentration (mg·mL <sup>-1</sup> ) | 8               | 99              | 35.245   | 1.01·10 <sup>-25</sup> | 0.74  | 2.02·10 <sup>-25</sup> | *               |
| OphtNE-3.70%      | Time (h)                             | 1               | 99              | 1.316    | 0.254                  | 0.013 | 0.508                  | ns              |
| OphtNE-3.70%      | Concentration:Time                   | 8               | 99              | 2.737    | 0.009                  | 0.181 | 0.018                  | *               |
| OphtNE-3.66%(K1%) | Concentration (mg·mL <sup>-1</sup> ) | 8               | 99              | 33.36    | 7.15·10 <sup>-25</sup> | 0.729 | 1.43·10 <sup>-24</sup> | *               |
| OphtNE-3.66%(K1%) | Time (h)                             | 1               | 99              | 0.476    | 0.492                  | 0.005 | 0.984                  | ns              |
| OphtNE-3.66%(K1%) | Concentration:Time                   | 8               | 99              | 0.983    | 0.454                  | 0.074 | 0.908                  | ns              |

\* significant (*p* < 0.05); ns: not significant

**Table S6:** One-way ANOVA assessing the effect of concentration for OphtNE-3.70%, pooling exposure times, based on the significant Concentration × Time interaction observed in the two-way ANOVA (Table S5). Values reported include degrees of freedom (DF), F-statistics, *p*-values, generalized eta-squared (ges), and adjusted *p*-values. Significant effects are indicated for *p* < 0.05.

| Treatment    | Concentration (mg·mL <sup>-1</sup> ) | DF <sub>n</sub> | DF <sub>d</sub> | <i>F</i> | <i>p</i> | ges                   | <i>p</i> _adjust | <i>p</i> < 0.05 |
|--------------|--------------------------------------|-----------------|-----------------|----------|----------|-----------------------|------------------|-----------------|
| OphtNE-3.70% | Negative Control                     | 1               | 99              | 2.772    | 0.099    | 0.027                 | 0.198            | ns              |
| OphtNE-3.70% | Positive Control                     | 1               | 99              | 0.000161 | 0.99     | 1.63·10 <sup>-6</sup> | 1                | ns              |
| OphtNE-3.70% | 0.65                                 | 1               | 99              | 0.829    | 0.365    | 0.008                 | 0.73             | ns              |
| OphtNE-3.70% | 1.30                                 | 1               | 99              | 2.225    | 0.139    | 0.022                 | 0.278            | ns              |
| OphtNE-3.70% | 2.60                                 | 1               | 99              | 0.912    | 0.342    | 0.009                 | 0.684            | ns              |
| OphtNE-3.70% | 5.20                                 | 1               | 99              | 0.007    | 0.935    | 6.67·10 <sup>-5</sup> | 1                | ns              |
| OphtNE-3.70% | 7.80                                 | 1               | 99              | 6.19     | 0.015    | 0.059                 | 0.03             | *               |
| OphtNE-3.70% | 10.4                                 | 1               | 99              | 9.288    | 0.003    | 0.086                 | 0.006            | *               |
| OphtNE-3.70% | 13.0                                 | 1               | 99              | 0.99     | 0.322    | 0.01                  | 0.644            | ns              |

\* significant (*p* < 0.05); ns: not significant
