# Supplementary material for: Multifunctional anionic nanoemulsion with linseed oil and lecithin: a preliminary approach for dry eye disease
Source: Beilstein J Nanotechnol. 2025 Oct 2;16:1711–33. doi: 10.3762/bjnano.16.120 (PMC12498254; doi:10.3762/bjnano.16.120)
Supplement: File 2 — Complementary statistical data. [file Beilstein_J_Nanotechnol-16-1711-s002.xlsx]

## Sheet: Dataset_Shapiro-Wilk
Dataset_Shapiro-Wilk
Treatments	Concentration (mg.mL-1)	Time (hours)	Variable	Statistic	p
OphtNE-3.70%	Negative Control	24	absorbance	0.997252747252748	0.899850280037233
OphtNE-3.70%	Negative Control	72	absorbance	0.985954507404384	0.935938906696965
OphtNE-3.70%	Positive Control	24	absorbance	0.97804322977903	0.890451367958444
OphtNE-3.70%	Positive Control	72	absorbance	0.945630482667257	0.688936437322355
OphtNE-3.70%	0.65	24	absorbance	0.90227014454276	0.442422635816058
OphtNE-3.70%	0.65	72	absorbance	0.960256178027397	0.780521064401896
OphtNE-3.70%	1.30	24	absorbance	0.986012444430482	0.936257308608756
OphtNE-3.70%	1.30	72	absorbance	0.852654674584656	0.234874059713103
OphtNE-3.70%	2.60	24	absorbance	0.96989765946595	0.840849521788244
OphtNE-3.70%	2.60	72	absorbance	0.864186679026531	0.275481793961275
OphtNE-3.70%	5.20	24	absorbance	0.858061774950459	0.253351744156932
OphtNE-3.70%	5.20	72	absorbance	0.765618077093487	0.0348169148544335
OphtNE-3.70%	7.80	24	absorbance	0.995403666853865	0.983217892939767
OphtNE-3.70%	7.80	72	absorbance	0.81206823617746	0.125683836659648
OphtNE-3.70%	10.40	24	absorbance	0.817433377357804	0.137338721849553
OphtNE-3.70%	10.40	72	absorbance	0.935567010309279	0.509844810046821
OphtNE-3.70%	13.00	24	absorbance	0.790044078733891	0.0855314651880975
OphtNE-3.70%	13.00	72	absorbance	0.826671035386632	0.179900936815872
OphtNE-3.66%(K1%)	Negative Control	24	absorbance	0.997252747252748	0.899850280037233
OphtNE-3.66%(K1%)	Negative Control	72	absorbance	0.985954507404384	0.935938906696965
OphtNE-3.66%(K1%)	Positive Control	24	absorbance	0.97804322977903	0.890451367958444
OphtNE-3.66%(K1%)	Positive Control	72	absorbance	0.945630482667257	0.688936437322355
OphtNE-3.66%(K1%)	0.65	24	absorbance	0.97403366843117	0.866279088442472
OphtNE-3.66%(K1%)	0.65	72	absorbance	0.969827064973526	0.840412158905947
OphtNE-3.66%(K1%)	1.30	24	absorbance	0.936940051400707	0.635758996322278
OphtNE-3.66%(K1%)	1.30	72	absorbance	0.878923766816142	0.321246781726036
OphtNE-3.66%(K1%)	2.60	24	absorbance	0.99253837378515	0.970090504773707
OphtNE-3.66%(K1%)	2.60	72	absorbance	0.94059491892194	0.657957629590471
OphtNE-3.66%(K1%)	5.20	24	absorbance	0.911556149701038	0.490685795897636
OphtNE-3.66%(K1%)	5.20	72	absorbance	0.85763377158055	0.251853179154693
OphtNE-3.66%(K1%)	7.80	24	absorbance	0.873921356985693	0.313323739205661
OphtNE-3.66%(K1%)	7.80	72	absorbance	0.960132890365449	0.616082803936858
OphtNE-3.66%(K1%)	10.40	24	absorbance	0.870967741935484	0.298275852154231
OphtNE-3.66%(K1%)	10.40	72	absorbance	0.923076923076923	0.463262874933794
OphtNE-3.66%(K1%)	13.00	24	absorbance	0.952784022081107	0.733541472148276
OphtNE-3.66%(K1%)	13.00	72	absorbance	0.8619231116255	0.267153485346051

## Sheet: Dataset_Outliers
Dataset_Outliers
Treatments	Concentration (mg.mL-1)	Time (hours)	Experiment	Median absorbance	Key	is.outlier	is.extreme
OphtNE-3.70%	Negative Control	24	S3	0.72	OphtNE-3.70%_NC_24_S3	TRUE	FALSE
OphtNE-3.70%	5.20	72	S3	0.186	OphtNE-3.70%_200_72_S3	TRUE	FALSE
OphtNE-3.70%	10.40	72	S1	0.25	OphtNE-3.70%_400_72_S1	TRUE	FALSE
OphtNE-3.70%	13.00	72	S2	0.724	OphtNE-3.70%_500_72_S2	TRUE	FALSE
OphtNE-3.66%(K1%)	Negative Control	24	S3	0.72	OphtNE-3.66%(K1%)_NC_24_S3	TRUE	FALSE
OphtNE-3.66%(K1%)	1.30	72	S3	0.306	OphtNE-3.66%(K1%)_50_72_S3	TRUE	FALSE
OphtNE-3.66%(K1%)	7.80	72	S4	0.251	OphtNE-3.66%(K1%)_300_72_S4	TRUE	FALSE
OphtNE-3.66%(K1%)	10.40	24	S4	0.136	OphtNE-3.66%(K1%)_400_24_S4	TRUE	FALSE
OphtNE-3.66%(K1%)	10.40	72	S1	0.098	OphtNE-3.66%(K1%)_400_72_S1	TRUE	FALSE

## Sheet: Dataset_Levene_Concentration
Dataset_Levene_Concentration
Treatments	Time (hours)	df1	df2	Statistic	p
OphtNE-3.70%	24	8	26	128327121940647	0.294650857875113
OphtNE-3.70%	72	8	24	235557341109507	0.0499592510646523
OphtNE-3.66%(K1%)	24	8	25	379886238083451	0.00482977471566165
OphtNE-3.66%(K1%)	72	8	24	186965243017333	0.112692117154061

## Sheet: Dataset_Levene_Treatment
Dataset_Levene_Treatment
Concentration (mg.mL-1)	Time (hours)	df1	df2	Statistic	p
Negative Control	24	1	4	0.00291219	1
Negative Control	72	1	6	0.000339311	1
Positive Control	24	1	6	3.41962e-18	1
Positive Control	72	1	6	9.40395e-18	1
0.65	24	1	6	132234626220688	0.293933439739019
0.65	72	1	6	0.525133	0.495935483482168
1.30	24	1	6	217595978062157	0.190629786816695
1.30	72	1	5	192663915968095	0.00709219508467059
2.60	24	1	6	443888800127816	0.0797173054224023
2.60	72	1	6	0.378351	0.561075648886931
5.20	24	1	6	0.269688	0.622133502019611
5.20	72	1	5	142585311355027	0.285997600752598
7.80	24	1	6	0.873025	0.386179435319379
7.80	72	1	5	383488448708973	0.00160193710238478
10.40	24	1	5	2465828628098	0.177143787409022
10.40	72	1	4	0.116883	0.749646729888219
13.00	24	1	6	245938332196228	0.167872147185745
13.00	72	1	5	0.667664	0.45103058963594

## Sheet: Dataset_Levene_Time
Dataset_Levene_Time
Treatments	Concentration (mg.mL-1)	df1	df2	Statistic	p
OphtNE-3.70%	Negative Control	1	5	788084448004564	0.0376686169354686
OphtNE-3.70%	Positive Control	1	6	1.5	0.266569703380069
OphtNE-3.70%	0.65	1	6	157003333404106	0.256820744060821
OphtNE-3.70%	1.30	1	6	432431917729956	0.082792068531119
OphtNE-3.70%	2.60	1	6	183449548711672	0.224378316104389
OphtNE-3.70%	5.20	1	5	10190765523585	0.024202687582728
OphtNE-3.70%	7.80	1	6	846923930464801	0.0269735346481121
OphtNE-3.70%	10.40	1	5	239574041637941	0.182343232338817
OphtNE-3.70%	13.00	1	5	154418867253582	0.269093338335203
OphtNE-3.66%(K1%)	Negative Control	1	5	788084448004564	0.0376686169354686
OphtNE-3.66%(K1%)	Positive Control	1	6	1.5	0.266569703380069
OphtNE-3.66%(K1%)	0.65	1	6	0.639714	0.454306331186781
OphtNE-3.66%(K1%)	1.30	1	5	437529415456057	0.0907015039793812
OphtNE-3.66%(K1%)	2.60	1	6	0.195116	0.674166613463014
OphtNE-3.66%(K1%)	5.20	1	6	0.0234437	0.883328358501534
OphtNE-3.66%(K1%)	7.80	1	5	0.47521	0.521278949020796
OphtNE-3.66%(K1%)	10.40	1	4	0.0816327	0.789282179206409
OphtNE-3.66%(K1%)	13.00	1	6	0.0084507	0.929747911793406
